# Supplementary material for: Component-based syntheses of trioxacarcin A, DC-45-A1 and structural analogues
Source: Springer Nature journal article supplement (doi:10.1038/nchem.1746), 2013-09-06
Supplement: 41557_2013_BFnchem1746_MOESM21_ESM.mol [file 41557_2013_BFnchem1746_MOESM21_ESM.mol]

  ChemDraw08231309322D

 49 56  0  0  0  0  0  0  0  0999 V2000
   -0.7181    2.7219    0.0000 C   0  0  0  0  0  0  0  0  0  0  0  0
   -0.7181    1.8969    0.0000 C   0  0  0  0  0  0  0  0  0  0  0  0
   -0.0036    1.4844    0.0000 C   0  0  0  0  0  0  0  0  0  0  0  0
    0.7109    1.8969    0.0000 C   0  0  0  0  0  0  0  0  0  0  0  0
    0.7109    2.7219    0.0000 C   0  0  0  0  0  0  0  0  0  0  0  0
   -0.0036    3.1344    0.0000 C   0  0  0  0  0  0  0  0  0  0  0  0
    1.4253    1.4844    0.0000 C   0  0  0  0  0  0  0  0  0  0  0  0
    2.1398    1.8969    0.0000 C   0  0  0  0  0  0  0  0  0  0  0  0
    2.1398    2.7219    0.0000 C   0  0  0  0  0  0  0  0  0  0  0  0
    1.4253    3.1344    0.0000 C   0  0  0  0  0  0  0  0  0  0  0  0
    2.8543    1.4844    0.0000 C   0  0  0  0  0  0  0  0  0  0  0  0
    3.5688    1.8969    0.0000 C   0  0  0  0  0  0  0  0  0  0  0  0
    3.5688    2.7219    0.0000 C   0  0  0  0  0  0  0  0  0  0  0  0
    2.8543    3.1344    0.0000 C   0  0  0  0  0  0  0  0  0  0  0  0
    4.2808    1.4858    0.0000 O   0  0  0  0  0  0  0  0  0  0  0  0
    2.8543    3.9566    0.0000 O   0  0  0  0  0  0  0  0  0  0  0  0
    2.8543    0.6622    0.0000 O   0  0  0  0  0  0  0  0  0  0  0  0
    1.4253    0.6622    0.0000 O   0  0  0  0  0  0  0  0  0  0  0  0
    1.4253    3.9566    0.0000 O   0  0  0  0  0  0  0  0  0  0  0  0
    0.7133    4.3677    0.0000 C   0  0  0  0  0  0  0  0  0  0  0  0
   -1.4301    3.1330    0.0000 C   0  0  0  0  0  0  0  0  0  0  0  0
   -1.4301    1.4858    0.0000 C   0  0  0  0  0  0  0  0  0  0  0  0
   -0.0036    0.6622    0.0000 O   0  0  0  0  0  0  0  0  0  0  0  0
   -0.7157    0.2483    0.0000 C   0  0  0  0  0  0  0  0  0  0  0  0
   -0.3032   -0.4662    0.0000 O   0  0  0  0  0  0  0  0  0  0  0  0
   -2.1446    1.0733    0.0000 O   0  0  0  0  0  0  0  0  0  0  0  0
   -1.4301   -0.1642    0.0000 C   0  0  0  0  0  0  0  0  0  0  0  0
   -2.1446    0.2483    0.0000 C   0  0  0  0  0  0  0  0  0  0  0  0
   -0.7157    1.0733    0.0000 C   0  0  0  0  0  0  0  0  0  0  0  0
   -1.3477    0.4618    0.0000 O   0  0  0  0  0  0  0  0  0  0  0  0
   -1.8426   -0.8787    0.0000 O   0  0  0  0  0  0  0  0  0  0  0  0
   -1.0176   -0.8787    0.0000 C   0  0  0  0  0  0  0  0  0  0  0  0
   -2.8567   -0.1628    0.0000 C   0  0  0  0  0  0  0  0  0  0  0  0
   -3.5688    0.2483    0.0000 O   0  0  0  0  0  0  0  0  0  0  0  0
   -2.8567   -0.9851    0.0000 O   0  0  0  0  0  0  0  0  0  0  0  0
   -4.2808   -0.1628    0.0000 C   0  0  0  0  0  0  0  0  0  0  0  0
   -3.5688   -1.3962    0.0000 C   0  0  0  0  0  0  0  0  0  0  0  0
   -0.3032   -1.2912    0.0000 C   0  0  0  0  0  0  0  0  0  0  0  0
   -1.0176   -1.7037    0.0000 O   0  0  0  0  0  0  0  0  0  0  0  0
   -1.0176   -2.5287    0.0000 C   0  0  0  0  0  0  0  0  0  0  0  0
   -0.3032   -2.9412    0.0000 C   0  0  0  0  0  0  0  0  0  0  0  0
    0.4113   -2.5287    0.0000 C   0  0  0  0  0  0  0  0  0  0  0  0
    0.4113   -1.7037    0.0000 C   0  0  0  0  0  0  0  0  0  0  0  0
   -1.7297   -2.9398    0.0000 C   0  0  0  0  0  0  0  0  0  0  0  0
   -0.7157   -3.6557    0.0000 C   0  0  0  0  0  0  0  0  0  0  0  0
    0.1093   -3.6557    0.0000 O   0  0  0  0  0  0  0  0  0  0  0  0
   -1.5379   -3.6557    0.0000 C   0  0  0  0  0  0  0  0  0  0  0  0
   -0.3046   -4.3677    0.0000 O   0  0  0  0  0  0  0  0  0  0  0  0
    1.1234   -2.9398    0.0000 O   0  0  0  0  0  0  0  0  0  0  0  0
  1  2  2  0      
  2  3  1  0      
  3  4  2  0      
  4  5  1  0      
  5  6  2  0      
  6  1  1  0      
  4  7  1  0      
  7  8  2  0      
  8  9  1  0      
  9 10  2  0      
 10  5  1  0      
  8 11  1  0      
 11 12  1  0      
 12 13  1  0      
 13 14  1  0      
 14  9  1  0      
 12 15  1  6      
 14 16  1  1      
 11 17  2  0      
  7 18  1  0      
 10 19  1  0      
 19 20  1  0      
  1 21  1  0      
 22  2  1  1      
  3 23  1  0      
 24 23  1  1      
 24 25  1  6      
 22 26  1  0      
 24 27  1  0      
 28 26  1  1      
 28 27  1  0      
 22 29  1  0      
 29 24  1  0      
 28 30  1  6      
 29 30  1  6      
 27 31  1  6      
 31 32  1  0      
 27 32  1  1      
 28 33  1  0      
 33 34  1  0      
 33 35  1  0      
 34 36  1  0      
 35 37  1  0      
 25 38  1  0      
 38 39  1  0      
 39 40  1  0      
 40 41  1  0      
 41 42  1  0      
 42 43  1  0      
 38 43  1  1      
 40 44  1  6      
 41 45  1  1      
 41 46  1  6      
 45 47  1  0      
 45 48  2  0      
 42 49  1  1      
M  END
