# Supplementary material for: Component-based syntheses of trioxacarcin A, DC-45-A1 and structural analogues
Source: Springer Nature journal article supplement (doi:10.1038/nchem.1746), 2013-09-06
Supplement: 41557_2013_BFnchem1746_MOESM63_ESM.mol [file 41557_2013_BFnchem1746_MOESM63_ESM.mol]

  ChemDraw08231309322D

 55 63  0  0  0  0  0  0  0  0999 V2000
   -1.4337    2.7212    0.0000 C   0  0  0  0  0  0  0  0  0  0  0  0
   -1.4337    1.8962    0.0000 C   0  0  0  0  0  0  0  0  0  0  0  0
   -0.7193    1.4837    0.0000 C   0  0  0  0  0  0  0  0  0  0  0  0
   -0.0048    1.8962    0.0000 C   0  0  0  0  0  0  0  0  0  0  0  0
   -0.0048    2.7212    0.0000 C   0  0  0  0  0  0  0  0  0  0  0  0
   -0.7193    3.1337    0.0000 C   0  0  0  0  0  0  0  0  0  0  0  0
    0.7097    1.4837    0.0000 C   0  0  0  0  0  0  0  0  0  0  0  0
    1.4241    1.8962    0.0000 C   0  0  0  0  0  0  0  0  0  0  0  0
    1.4241    2.7212    0.0000 C   0  0  0  0  0  0  0  0  0  0  0  0
    0.7097    3.1337    0.0000 C   0  0  0  0  0  0  0  0  0  0  0  0
    2.1386    1.4837    0.0000 C   0  0  0  0  0  0  0  0  0  0  0  0
    2.8531    1.8962    0.0000 C   0  0  0  0  0  0  0  0  0  0  0  0
    2.8531    2.7212    0.0000 C   0  0  0  0  0  0  0  0  0  0  0  0
    2.1386    3.1337    0.0000 C   0  0  0  0  0  0  0  0  0  0  0  0
    2.1386    3.9559    0.0000 O   0  0  0  0  0  0  0  0  0  0  0  0
    2.1386    0.6615    0.0000 O   0  0  0  0  0  0  0  0  0  0  0  0
    0.7097    0.6615    0.0000 O   0  0  0  0  0  0  0  0  0  0  0  0
    0.7097    3.9559    0.0000 O   0  0  0  0  0  0  0  0  0  0  0  0
   -0.0024    4.3670    0.0000 C   0  0  0  0  0  0  0  0  0  0  0  0
   -2.1458    3.1323    0.0000 C   0  0  0  0  0  0  0  0  0  0  0  0
   -2.1458    1.4851    0.0000 C   0  0  0  0  0  0  0  0  0  0  0  0
   -0.7193    0.6615    0.0000 O   0  0  0  0  0  0  0  0  0  0  0  0
   -1.4313    0.2476    0.0000 C   0  0  0  0  0  0  0  0  0  0  0  0
   -1.0188   -0.4669    0.0000 O   0  0  0  0  0  0  0  0  0  0  0  0
   -2.8603    1.0726    0.0000 O   0  0  0  0  0  0  0  0  0  0  0  0
   -2.1458   -0.1649    0.0000 C   0  0  0  0  0  0  0  0  0  0  0  0
   -2.8603    0.2476    0.0000 C   0  0  0  0  0  0  0  0  0  0  0  0
   -1.4313    1.0726    0.0000 C   0  0  0  0  0  0  0  0  0  0  0  0
   -2.0634    0.4611    0.0000 O   0  0  0  0  0  0  0  0  0  0  0  0
   -2.5583   -0.8794    0.0000 O   0  0  0  0  0  0  0  0  0  0  0  0
   -1.7333   -0.8794    0.0000 C   0  0  0  0  0  0  0  0  0  0  0  0
   -3.5724   -0.1635    0.0000 C   0  0  0  0  0  0  0  0  0  0  0  0
   -4.2844    0.2476    0.0000 O   0  0  0  0  0  0  0  0  0  0  0  0
   -3.5724   -0.9858    0.0000 O   0  0  0  0  0  0  0  0  0  0  0  0
   -4.9965   -0.1635    0.0000 C   0  0  0  0  0  0  0  0  0  0  0  0
   -4.2844   -1.3969    0.0000 C   0  0  0  0  0  0  0  0  0  0  0  0
   -1.0188   -1.2919    0.0000 C   0  0  0  0  0  0  0  0  0  0  0  0
   -1.7333   -1.7044    0.0000 O   0  0  0  0  0  0  0  0  0  0  0  0
   -1.7333   -2.5294    0.0000 C   0  0  0  0  0  0  0  0  0  0  0  0
   -1.0188   -2.9419    0.0000 C   0  0  0  0  0  0  0  0  0  0  0  0
   -0.3044   -2.5294    0.0000 C   0  0  0  0  0  0  0  0  0  0  0  0
   -0.3044   -1.7044    0.0000 C   0  0  0  0  0  0  0  0  0  0  0  0
   -2.4454   -2.9405    0.0000 C   0  0  0  0  0  0  0  0  0  0  0  0
   -1.4313   -3.6564    0.0000 C   0  0  0  0  0  0  0  0  0  0  0  0
   -0.6063   -3.6564    0.0000 O   0  0  0  0  0  0  0  0  0  0  0  0
   -2.2536   -3.6564    0.0000 C   0  0  0  0  0  0  0  0  0  0  0  0
   -1.0202   -4.3684    0.0000 O   0  0  0  0  0  0  0  0  0  0  0  0
    0.4077   -2.9405    0.0000 O   0  0  0  0  0  0  0  0  0  0  0  0
    2.8531    4.3684    0.0000 C   0  0  0  0  0  0  0  0  0  0  0  0
    3.5675    3.9559    0.0000 C   0  0  0  0  0  0  0  0  0  0  0  0
    3.5675    3.1309    0.0000 C   0  0  0  0  0  0  0  0  0  0  0  0
    4.2820    2.7184    0.0000 C   0  0  0  0  0  0  0  0  0  0  0  0
    4.9965    3.1309    0.0000 C   0  0  0  0  0  0  0  0  0  0  0  0
    4.9965    3.9559    0.0000 C   0  0  0  0  0  0  0  0  0  0  0  0
    4.2820    4.3684    0.0000 C   0  0  0  0  0  0  0  0  0  0  0  0
  1  2  2  0      
  2  3  1  0      
  3  4  2  0      
  4  5  1  0      
  5  6  2  0      
  6  1  1  0      
  4  7  1  0      
  7  8  2  0      
  8  9  1  0      
  9 10  2  0      
 10  5  1  0      
  8 11  1  0      
 11 12  1  0      
 12 13  1  0      
 13 14  1  0      
 14  9  1  0      
 14 15  1  1      
 11 16  2  0      
  7 17  1  0      
 10 18  1  0      
 18 19  1  0      
  1 20  1  0      
 21  2  1  1      
  3 22  1  0      
 23 22  1  1      
 23 24  1  6      
 21 25  1  0      
 23 26  1  0      
 27 25  1  1      
 27 26  1  0      
 21 28  1  0      
 28 23  1  0      
 27 29  1  6      
 28 29  1  6      
 26 30  1  6      
 30 31  1  0      
 26 31  1  1      
 27 32  1  0      
 32 33  1  0      
 32 34  1  0      
 33 35  1  0      
 34 36  1  0      
 24 37  1  0      
 37 38  1  0      
 38 39  1  0      
 39 40  1  0      
 40 41  1  0      
 41 42  1  0      
 37 42  1  1      
 39 43  1  6      
 40 44  1  1      
 40 45  1  6      
 44 46  1  0      
 44 47  2  0      
 41 48  1  1      
 15 49  1  0      
 49 50  1  0      
 50 51  2  0      
 51 52  1  0      
 52 53  2  0      
 53 54  1  0      
 54 55  2  0      
 55 50  1  0      
M  END
